1 **LST-AI: a Deep Learning Ensemble for Accurate MS Lesion Segmentation**

2

3 Tun Wiltgen<sup>1,2</sup>, Julian McGinnis<sup>1,2,3</sup>, Sarah Schlaeger<sup>4</sup>, CuiCi Voon<sup>1,2</sup>, Achim Berthele<sup>1</sup>, Daria  
4 Bischl<sup>4</sup>, Lioba Grundl<sup>4</sup>, Nikolaus Will<sup>4</sup>, Marie Metz<sup>4</sup>, David Schinz<sup>4,5</sup>, Dominik Sepp<sup>4</sup>, Philipp  
5 Prucker<sup>4</sup>, Benita Schmitz-Koep<sup>4</sup>, Claus Zimmer<sup>4</sup>, Bjoern Menze<sup>6</sup>, Daniel Rueckert<sup>3,7</sup>, Bernhard  
6 Hemmer<sup>1,8</sup>, Jan Kirschke<sup>4</sup>, Mark Mühlau<sup>1,2\*</sup>, Benedikt Wiestler<sup>4,9\*</sup>

7

8 1 Department of Neurology, School of Medicine, Klinikum rechts der Isar, Technical University  
9 of Munich, Munich, Germany

10 2 TUM-Neuroimaging Center, School of Medicine, Technical University of Munich, Munich,  
11 Germany

12 3 Department of Computer Science, Institute for AI in Medicine, Technical University of Munich,  
13 Munich, Germany

14 4 Department of Diagnostic and Interventional Neuroradiology, School of Medicine, Klinikum  
15 rechts der Isar, Technical University of Munich, Munich, Germany

16 5 Institute of Radiology, University Hospital Erlangen, Friedrich-Alexander-Universität Erlangen-  
17 Nürnberg, Erlangen, Germany

18 6 Department of Quantitative Biomedicine, University of Zurich, Zurich, Switzerland

19 7 Department of Computing, Imperial College London, London, United Kingdom

20 8 Munich Cluster for Systems Neurology (SyNergy), Munich, Germany

21 9 TranslaTUM, Center for Translational Cancer Research, Munich, Germany

22 \* indicates equal contribution

23 **Abstract**

24  
25 Automated segmentation of brain white matter lesions is crucial for both clinical assessment and  
26 scientific research in multiple sclerosis (MS). Over a decade ago, we introduced a lesion  
27 segmentation tool, LST, engineered with a lesion growth algorithm (LST-LGA). While recent  
28 lesion segmentation approaches have leveraged artificial intelligence (AI), they often remain  
29 proprietary and difficult to adopt. Here, we present LST-AI, an advanced deep learning-based  
30 extension of LST that consists of an ensemble of three 3D-UNets.

31  
32 LST-AI specifically addresses the imbalance between white matter (WM) lesions and non-  
33 lesioned WM. It employs a composite loss function incorporating binary cross-entropy and  
34 Tversky loss to improve segmentation of the highly heterogeneous MS lesions. We train the  
35 network ensemble on 491 MS pairs of T1w and FLAIR images, collected in-house from a 3T  
36 MRI scanner, and expert neuroradiologists manually segmented the utilized lesion maps for  
37 training. LST-AI additionally includes a lesion location annotation tool, labeling lesion location  
38 according to the 2017 McDonald criteria (periventricular, infratentorial, juxtacortical, subcortical).  
39 We conduct evaluations on 270 test cases —comprising both in-house (n=167) and publicly  
40 available data (n=103)—using the Anima segmentation validation tools and compare LST-AI  
41 with several publicly available lesion segmentation models.

42  
43 Our empirical analysis shows that LST-AI achieves superior performance compared to existing  
44 methods. Its Dice and F1 scores exceeded 0.5, outperforming LST-LGA, LST-LPA, SAMSEG,  
45 and the popular nnUNet framework, which all scored below 0.45. Notably, LST-AI demonstrated  
46 exceptional performance on the MSSEG-1 challenge dataset, an international WM lesion  
47 segmentation challenge, with a Dice score of 0.65 and an F1 score of 0.63—surpassing all  
48 other competing models at the time of the challenge. With increasing lesion volume, the lesion  
49 detection rate rapidly increased with a detection rate of >75% for lesions larger than 60mm<sup>3</sup>.

50  
51 Given its higher segmentation performance, we recommend that research groups currently  
52 using LST-LGA transition to LST-AI. To facilitate broad adoption, we are releasing LST-AI as an  
53 open-source model, available as a command-line tool, dockerized container, or Python script,  
54 enabling diverse applications across multiple platforms.

55  
56  
57 **Keywords:** Multiple Sclerosis, Artificial Intelligence, Lesion Segmentation, Magnetic Resonance  
58 Imaging, White Matter Lesions, Deep Learning

## 59 1. Introduction

60 Multiple sclerosis (MS) is a complex chronic inflammatory disease of the central nervous  
61 system. Clinically, MS typically manifests through neurological deficits which are mainly driven  
62 by inflammatory demyelinating lesions occurring in brain white matter and in the spinal cord and  
63 by neurodegeneration (axonal and neuronal loss). To date, inflammatory white matter lesions  
64 are a hallmark of MS and their identification on magnetic resonance imaging (MRI) plays a  
65 crucial role in the diagnosis and follow-up of MS (Filippi et al., 2018; Thompson, Banwell, et al.,  
66 2018; Thompson, Baranzini, et al., 2018). In addition, the location of lesions within the brain  
67 plays a role in diagnosing MS, as lesions in periventricular, juxtacortical, and infratentorial  
68 regions are part of the MS diagnostic criteria by indicating dissemination in space. In contrast,  
69 lesions in the subcortical region are solely considered to monitor disease progression  
70 (Thompson, Banwell, et al., 2018).

71  
72 In clinical routine and research, the gold standard of lesion identification and segmentation is  
73 manual segmentation by trained neuroradiological experts. However, this constitutes a time-  
74 consuming task with both relevant inter- and intra-rater variability, thereby hampering studies  
75 with large datasets aiming to improve our understanding of MS.

76  
77 In past years, many algorithms and tools have been developed and published with the goal of  
78 accurate automated lesion segmentation. As one of the early contributions to this field, we  
79 published the Lesion Segmentation Toolbox (LST), which has since been applied in numerous  
80 scholarly publications (Schmidt et al., 2012). While early segmentation algorithms have been  
81 designed primarily using statistical and early machine learning models such as Support Vector  
82 Machines, Gaussian Mixture Models or engineered by using manually selected features  
83 (Schmidt et al., 2012), more recent approaches incorporate learning-based features via  
84 encoder/decoder model stages (Cerri et al., 2021) or learn these end to end in fully  
85 convolutional models in (semi-) supervised settings (Commowick et al., 2018). With the advent  
86 of artificial intelligence (AI), automated lesion segmentation tools based on convolutional neural  
87 networks (CNN) have become increasingly popular and indeed provide similar or higher  
88 segmentation accuracy than earlier, machine learning-based methods (Diaz-Hurtado et al.,  
89 2022; H. Li et al., 2018; Ma et al., 2022; Zeng et al., 2020). This is also reflected in the rankings  
90 of published MS lesion segmentation challenges, e.g., MICCAI 2016 (Commowick et al., 2018)  
91 and ISBI 2015 (Carass et al., 2017). While CNN-based models often outperform earlier models  
92 in challenges, they only excel with a sufficient number of training data, as they are designed to  
93 learn priors and features automatically and do not incorporate manual feature selection.  
94 Consequently, they are especially prone to overfitting to the training data. Moreover, and in  
95 contrast to earlier machine learning models, CNNs are comparatively harder to regularize, as  
96 they have higher model and learning capacity, larger number of model parameters and thus  
97 more complex loss landscapes. Therefore, a large performance gap between training set and  
98 test set is often noticeable and highlights the need to evaluate the performance of CNN-based  
99 models on heterogeneous, external test data. Overcoming this gap and generalizing  
100 segmentation models in order to be applicable to data from multiple protocols and centers is  
101 one of the main on-going challenges for AI-based approaches. In this context, some AI-based

102 approaches that have previously been published are optimized towards transferability: Valverde  
103 et al. have provided *nicMSLesions*, a CNN-based lesion segmentation method that is able to  
104 adjust to a new image domain by retraining their model on a single image (Valverde et al.,  
105 2019). Furthermore, recent studies successfully train their models on one dataset and test it on  
106 another, external dataset, for which the MICCAI 2016 (Commowick et al., 2021) and ISBI 2015  
107 (Carass et al., 2017) datasets are often selected (Cerri et al., 2021; Gentile et al., 2023;  
108 Kamraoui et al., 2022; Krishnan et al., 2023; X. Li et al., 2022; McKinley et al., 2021). Hence,  
109 the research field is moving towards more generalized segmentation tools, which is an  
110 important step towards clinical applicability of these methods.

111  
112 In this study, we introduce a deep learning-based extension of LST. We carefully explain our  
113 selection of model architecture and describe the training and test set used, and show how our  
114 composite loss function allows us to optimize our model for generalizability on MRIs of unseen  
115 test centers. To support our claim of generalizability, we also compare the performance of our  
116 model against existing MS lesion segmentation algorithms. To facilitate studies and applications  
117 in MS research, we provide this enhanced toolkit as open source to the imaging community  
118 (<https://github.com/Complmg/LST-AI>).

## 119 2. Methods

### 120 2.1. Datasets

121 In the following section, we characterize and define training and test set, including details on  
122 image acquisition. With regard to in-house datasets, we respected the Code of Ethics of the  
123 World Medical Association (Declaration of Helsinki) for experiments involving humans; the study  
124 was approved by the local ethics committee.

125  
126 For the training set, we used an in-house dataset consisting of 491 paired 3D FLAIR and 3D  
127 T1w images acquired on a 3.0T Achieva scanner (Philips Medical Systems, Best, The  
128 Netherlands) to train both our proposed LST-AI segmentation model and the nnUNet baseline.  
129 Testing and evaluation of segmentation performance of all methods was conducted on a  
130 combination of multiple datasets and on each dataset individually. The test set includes two in-  
131 house datasets and four publicly available datasets. The two in-house test datasets consist of  
132 data acquired on the same 3.0T Achieva scanner used for training data acquisition and on two  
133 further 3.0T scanners (Achieva dStream and Ingenia, Philips Medical Systems, Best, The  
134 Netherlands), respectively. The four publicly available datasets are: (i) msisbi: ISBI 2015 training  
135 data (Carass et al., 2017) (<https://smart-stats-tools.org/lesion-challenge-2015>); (ii) msljub:  
136 dataset published by Laboratory of Imaging Technologies (Lesjak et al., 2018) ([https://lit.fe.uni-  
137 lj.si/en/research/resources/3D-MR-MS/](https://lit.fe.uni-lj.si/en/research/resources/3D-MR-MS/)); (iii) mssegtest: MICCAI 2016 challenge test dataset  
138 (Commowick et al., 2021) (<https://shanoir.irisa.fr/shanoir-ng/welcome>) and (iv) mssegtrain:  
139 MICCAI 2016 challenge training dataset (Commowick et al., 2021)  
140 (<https://shanoir.irisa.fr/shanoir-ng/welcome>). One case (msseg-test-center07-08) was removed  
141 from the mssegtest dataset because it included incorrect ground truth data. In total, the test set  
142 consists of 270 images from 254 subjects (note that the publicly available ISBI dataset is a

143 longitudinal dataset). Further characteristics of the datasets, including data on lesion load, are  
 144 provided in Table 1. Details on image acquisition are provided in Table 2.  
 145  
 146

| dataset           | #subjects | #scans | age (years)                | female / male | diagnosis                                                       | number of lesions                                              | total lesion volume (mm <sup>3</sup> )                                    | publication              | link |
|-------------------|-----------|--------|----------------------------|---------------|-----------------------------------------------------------------|----------------------------------------------------------------|---------------------------------------------------------------------------|--------------------------|------|
| in-house training | 491       | 491    | mean(sd) = 34.3 (9.5)      | 330/161       | RRMS (261)<br>CIS (227)<br>ON (3)                               | mean(sd) = 25.54 (30.59)<br>median(IQR) = 15.0 (6.0-33.0)      | mean(sd) = 3492.96 (7300.31)<br>median(IQR) = 1244.0 (419.5-3767.5)       | N/A                      | N/A  |
| in-house test1    | 83        | 83     | mean(sd) = 35.0 (9.1)      | 57/26         | RRMS (8)<br>CIS (74)<br>ON (1)                                  | mean(sd) = 25.25 (17.97)<br>median(IQR) = 22.0 (13.0-33.5)     | mean(sd) = 2828.60 (4108.44)<br>median(IQR) = 1465.0 (639.5-3432.5)       | N/A                      | N/A  |
| in-house test2    | 84        | 84     | mean(sd) = 33.2 (8.1)      | 50/34         | RRMS (78)<br>PPMS (2)<br>CIS (3)<br>Myelitis (1)                | mean(sd) = 29.40 (27.81)<br>median(IQR) = 21.0 (8.0-44.0)      | mean(sd) = 13764.67 (18991.13)<br>median(IQR) = 6024.5 (1927.0-18547.75)  | N/A                      | N/A  |
| msisbi            | 5         | 21     | mean(sd) = 43.5 (10.3)     | 4/1           | RRMS (4)<br>PPMS (1)                                            | mean(sd) = 45.95 (20.92)<br>median(IQR) = 41.0 (34.0-47.0)     | mean(sd) = 12889.76 (11095.38)<br>median(IQR) = 7354.0 (3678.0-18425.0)   | (Carass et al., 2017)    | (1)  |
| msljub            | 30        | 30     | median(range) = 39 (25-64) | 23/7          | RRMS (24)<br>SPMS (2)<br>PRMS (1)<br>CIS (2)<br>Unspecified (1) | mean(sd) = 111.23 (106.68)<br>median(IQR) = 92.0 (31.25-125.0) | mean(sd) = 17336.87 (16115.41)<br>median(IQR) = 14046.5 (1758.0-28430.25) | (Lesjak et al., 2018)    | (2)  |
| mssegtest         | 37        | 37     | mean(sd) = 46.8 (10.3)     | 29/8          | N/A                                                             | mean(sd) = 44.89 (42.11)<br>median(IQR) = 29.0 (13.0-64.0)     | mean(sd) = 12672.73 (15099.75)<br>median(IQR) = 7348.0 (1453.0-17271.0)   | (Commowick et al., 2021) | (3)  |
| mssegrain         | 15        | 15     | mean(sd) = 41.6 (9.8)      | 8/7           | N/A                                                             | mean(sd) = 41.67 (30.21)<br>median(IQR) = 39.0 (18.0-56.5)     | mean(sd) = 20729.87 (20606.48)<br>median(IQR) = 12366.0 (3783.0-33198.5)  | (Commowick et al., 2021) | (3)  |

147 Table 1

148 Characteristics of the datasets. Three in-house datasets (training, test1, and test2) were used, as well as  
 149 the public datasets msisbi from the ISBI 2015 challenge (Carass et al., 2017), msljub published by the  
 150 Laboratory of Imaging Technologies (Lesjak et al., 2018), and mssegtest and mssegrain which are the  
 151 testing and training datasets from the MICCAI 2016 challenge, respectively (Commowick et al., 2021).  
 152 Abbreviations: CIS: clinically isolated syndrome, IQR: interquartile range, N/A: not applicable/available,  
 153 ON: optic neuritis, PPMS: primary progressive multiple sclerosis, RRMS: relapsing-remitting multiple  
 154 sclerosis, sd: standard deviation, SPMS: secondary progressive multiple sclerosis

155 (1) <https://smart-stats-tools.org/lesion-challenge-2015>

156 (2) <https://lit.fe.uni-lj.si/en/research/resources/3D-MR-MS/>

157 (3) <https://shanoir.irisa.fr/shanoir-ng/welcome>

158

159

| dataset           | scanner                          | field strength | sequence                  | voxel size | #scans |
|-------------------|----------------------------------|----------------|---------------------------|------------|--------|
| in-house training | Achieva, Philips Medical Systems | 3.0T           | T1w: TR=9ms, TE=4ms, FA=8 | 1x1x1mm3   | 491    |

|                |                                          |      |                                                            |                   |    |
|----------------|------------------------------------------|------|------------------------------------------------------------|-------------------|----|
|                |                                          |      | FLAIR: TR=10000ms, TE=140ms, TI=2750ms                     | 0.9x0.9x1.5mm3    |    |
| in-house test1 | Achieva, Philips Medical Systems         | 3.0T | T1w: TR=9ms, TE=4ms, FA=8                                  | 1x1x1mm3          | 83 |
|                |                                          |      | FLAIR: TR=10000ms, TE=140ms, TI=2750ms                     | 0.9x0.9x1.5mm3    |    |
| in-house test2 | Achieva dStream, Philips Medical Systems | 3.0T | T1w: TR=9ms, TE=4ms, FA=8                                  | 0.75x0.75x0.75mm3 | 17 |
|                |                                          |      | FLAIR: TR=4800ms, TE=270ms, TI=1650ms                      | 0.75x0.75x0.75mm3 |    |
|                | Ingenia, Philips Medical Systems         | 3.0T | T1w: TR=9ms, TE=4ms, FA=8                                  | 0.75x0.75x0.75mm3 | 67 |
|                |                                          |      | FLAIR: TR=4800ms, TE=320ms, TI=1650ms                      | 0.75x0.75x0.75mm3 |    |
| msisbi         | Philips Medical Systems                  | 3.0T | T1w: TR=10.3ms, TE=6ms, FA=8                               | 0.82x0.82x1.17mm3 | 21 |
|                |                                          |      | FLAIR: TE=68ms, TI=835ms                                   | 0.82x0.82x2.2mm3  |    |
| msljub         | Siemens Magnetom Trio                    | 3.0T | T1w: TR=2000ms, TE=20ms, TI=800ms, FA=120                  | 0.42x0.42x3.3mm3  | 30 |
|                |                                          |      | FLAIR: TR=5000ms, TE=392ms, TI=1800ms, FA=120              | 0.47x0.47x0.8mm3  |    |
| mssegtest      | Siemens Verio                            | 3.0T | T1w: TR=1900ms, TE=2.26ms, FA=9                            | 1x1x1mm3          | 10 |
|                |                                          |      | FLAIR: TR=5000ms, TE=400ms, TI=1800ms, FA=120              | 0.5x0.5x1.1mm3    |    |
|                | General Electrics Discovery              | 3.0T | T1w: TR=[7.5,8]ms, TE=3.2ms, FA=10                         | 0.47x0.47x0.6mm3  | 8  |
|                |                                          |      | FLAIR: TR=9000ms, TE=[140,145]ms, TI=[2355, 2362]ms, FA=90 | 0.47x0.47x0.9mm3  |    |
|                | Siemens Aera                             | 1.5T | T1w: TR=1860ms, TE=3.37ms, FA=15                           | 1.08x1.08x0.9mm3  | 9  |
|                |                                          |      | FLAIR:TR=5000ms, TE=336ms, TI=1800ms, FA=120               | 1.03x1.03x1.25mm3 |    |
|                | Ingenia, Philips Medical Systems         | 3.0T | T1w: TR=9.4ms, TE=4.3ms, FA=8                              | 0.74x0.74x0.85mm3 | 10 |
|                |                                          |      | FLAIR:TR=5400ms, TE=360ms, TI=1800ms, FA=90                | 0.74x0.74x0.7mm3  |    |
| mssegtrain     | Siemens Verio                            | 3.0T | T1w: TR=1900ms, TE=2.26ms, FA=9                            | 1x1x1mm3          | 5  |
|                |                                          |      | FLAIR: TR=5000ms, TE=400ms, TI=1800ms, FA=120              | 0.5x0.5x1.1mm3    |    |
|                | Siemens Aera                             | 1.5T | T1w: TR=1860ms, TE=3.37ms, FA=15                           | 1.08x1.08x0.9mm3  | 5  |
|                |                                          |      | FLAIR:TR=5000ms, TE=336ms, TI=1800ms, FA=120               | 1.03x1.03x1.25mm3 |    |

|  |                                  |      |                                             |                   |   |
|--|----------------------------------|------|---------------------------------------------|-------------------|---|
|  | Ingenia, Philips Medical Systems | 3.0T | T1w: TR=9.4ms, TE=4.3ms, FA=8               | 0.74x0.74x0.85mm3 | 5 |
|  |                                  |      | FLAIR:TR=5400ms, TE=360ms, TI=1800ms, FA=90 | 0.74x0.74x0.7mm3  |   |

160 Table 2

161 Acquisition settings of the datasets.

162 Abbreviations: FA: flip angle, FLAIR: fluid-attenuated inversion recovery, TE: echo time, TI: inversion  
163 time, TR: repetition time, T1w: T1-weighted

## 164 2.2. Preprocessing

165 To guarantee fair comparisons across all baselines, we standardize preprocessing across all  
166 datasets and methods. Firstly, we register (affine registration) all images to the ICBM 152  
167 nonlinear atlas version 2009 template ([https://www.mcgill.ca/bic/neuroinformatics/brain-atlases-](https://www.mcgill.ca/bic/neuroinformatics/brain-atlases-human)  
168 human) using the Greedy command line tool (P. Yushkevich, 2016/2023; P. A. Yushkevich et  
169 al., 2016). Subsequently, we use the deep learning-based HD-BET brain extraction tool to  
170 generate skull-stripped images (Isensee et al., 2019). Next, the shape of the skull-stripped  
171 images is cropped to the size that is required for the 3D UNets and intensities are normalized to  
172 [0;1]. To benchmark methods in its intended environment, we opt for non-skull-stripped images  
173 for SAMSEG, as well as the legacy algorithms of LST, the Lesion Prediction Algorithm (LST-  
174 LPA) and the Lesion Growth Algorithm (LST-LGA), which perform optimally with whole-brain  
175 data. Consequently, we omit the HD-BET skull-stripping, the cropping, and the intensity  
176 normalization preprocessing steps for these specific baselines, while retaining it for others.

177  
178 This standardized preprocessing (including skull-stripping) is also integrated into our LST-AI  
179 toolbox, providing users with a streamlined approach.

## 180 2.3. Lesion segmentation

181 In this section, we first describe the proposed lesion segmentation tool followed by benchmark  
182 methods that have been applied in many studies and to which the proposed tool is compared.  
183 Finally, we outline the manual lesion segmentation workflows employed across the different  
184 datasets.

### 185 2.3.1. LST-AI ensemble network

186 The LST-AI tool encompasses preprocessing, lesion segmentation and, optionally, lesion  
187 location annotation. An overview of the workflow is shown in Figure 1.

188

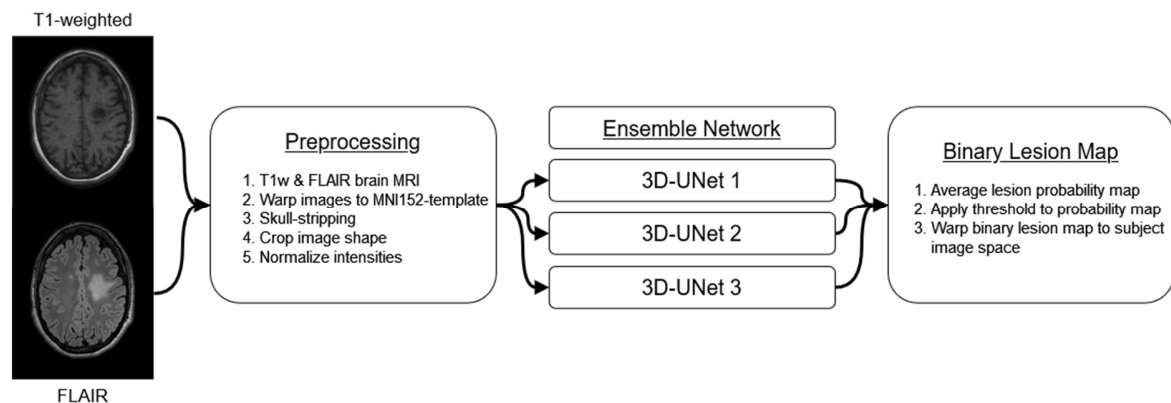

189  
190  
191  
192  
193  
194  
195  
196  
197

Figure 1

The different processing steps of the holistic LST-AI tool are presented. First, a pair of T1w and FLAIR images is warped to MNI space, then skull-stripped, cropped and intensity-normalized during preprocessing. The resulting images are used as input for the three 3D-UNets of the ensemble network. Each one of the UNets provides a lesion probability map. To generate the binary lesion map, the three lesion probability maps are averaged and a threshold is subsequently applied. Finally, the binary lesion map is warped back to the subject image space (original space of the FLAIR image).

198 The preprocessing functionality included in LST-AI is outlined in section 2.2. Specifically, the  
199 T1w and FLAIR images are warped to the MNI152-template, then skull-stripped, center cropped  
200 to shape (192, 192, 192), and, finally, intensities were normalized to [0;1].

201  
202 With respect to the model architecture, LST-AI is based on an ensemble of three 3D-UNets.  
203 Each UNet is built upon the 3D-UNet (Çiçek et al., 2016) architecture and inspired by nnUNet  
204 (Isensee et al., 2021). It is composed of 5 encoder and 5 decoder blocks. Each of these blocks  
205 is built from two convolution blocks (3D convolution, instance normalization, leaky ReLU  
206 activation), and skip connections between respective encoder and decoder blocks (see Figure  
207 2). In encoder blocks, downsampling is implemented via strided convolutions with stride 2 and  
208 transposed convolutions are used for upscaling in decoder blocks. Following the architectural  
209 choices in nnUNet (Isensee et al., 2021), we employ deep supervision layers in the training with  
210 the intuition of allowing gradients to flow deeper into the networks' layers (Wang et al., 2015).  
211 The number of deep supervision layers differed for the three UNets: one UNet included one  
212 deep supervision layer and the two other UNets included two deep supervision layers. For the  
213 loss function, we used a combination of Tversky loss (Salehi et al., 2017) (with higher  
214 penalization of false-negative lesion omissions) and binary cross-entropy in the deep  
215 supervision layers and a combined dice loss and binary cross-entropy in the full-resolution  
216 output. During training, we randomly chained intensity (random Gaussian noise, random  
217 Gaussian smoothing, random gamma adjustment) and geometry augmentations (random flips  
218 and crops). Each model was trained for a total of 1000 epochs, using the stochastic gradient  
219 descent optimizer (with Nesterov momentum) and a polynomial learning rate decay, starting at  
220 1e-2. In total, three training runs were started from scratch to create an ensemble of three  
221 models, a technique previously reported (H. Li et al., 2018).

222



223

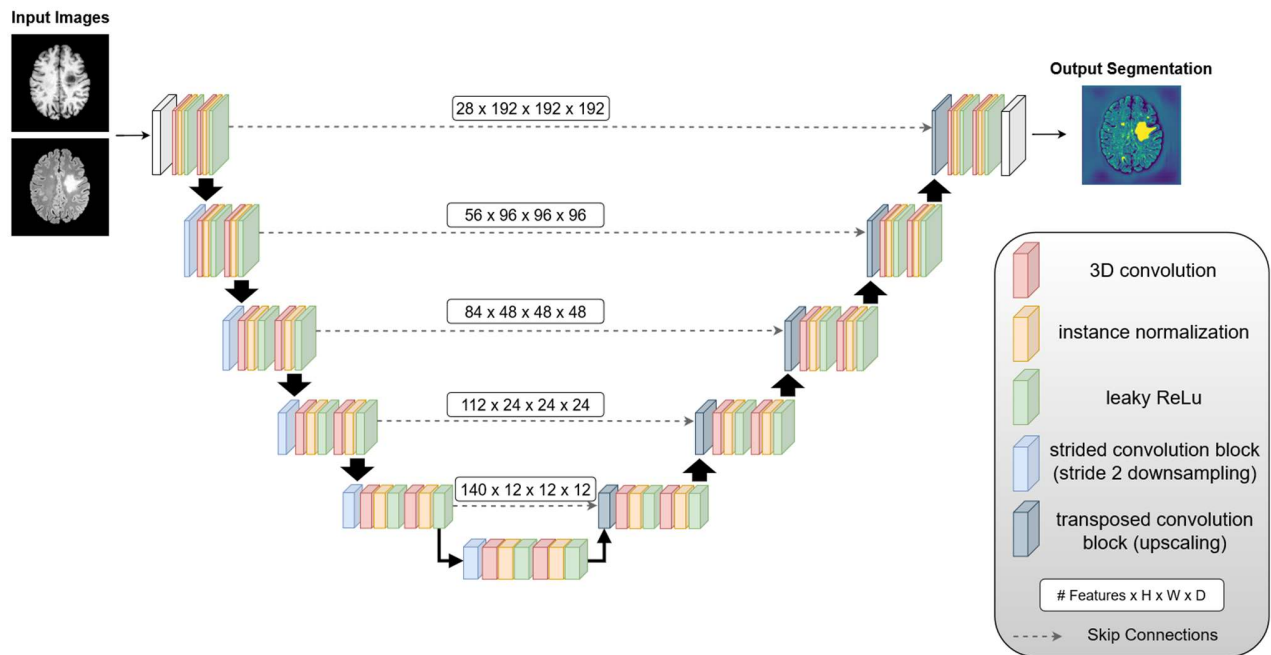

224

225 Figure 2

226 Architecture of the 3D-UNets which constitute the ensemble network of LST-AI. They comprise two  
227 channels (one for T1w images and one for FLAIR images) and consist of 5 encoder and 5 decoder  
228 blocks. Strided convolutions (stride 2) are used for downsampling and transposed convolutions are used  
229 for upscaling. Encoder and decoder blocks are connected via skip connections.

230

231 For the final segmentation output, the preprocessed T1w and FLAIR images are used as input  
232 for each one of the 3D UNets which generate three lesion probability maps. The final binary  
233 lesion map is obtained by averaging the three lesion probability maps and subsequent  
234 thresholding (default threshold of 0.5). This workflow, including the ground truth segmentation,  
235 is illustrated in Figure 3, using an example of the msljub dataset.

236

237

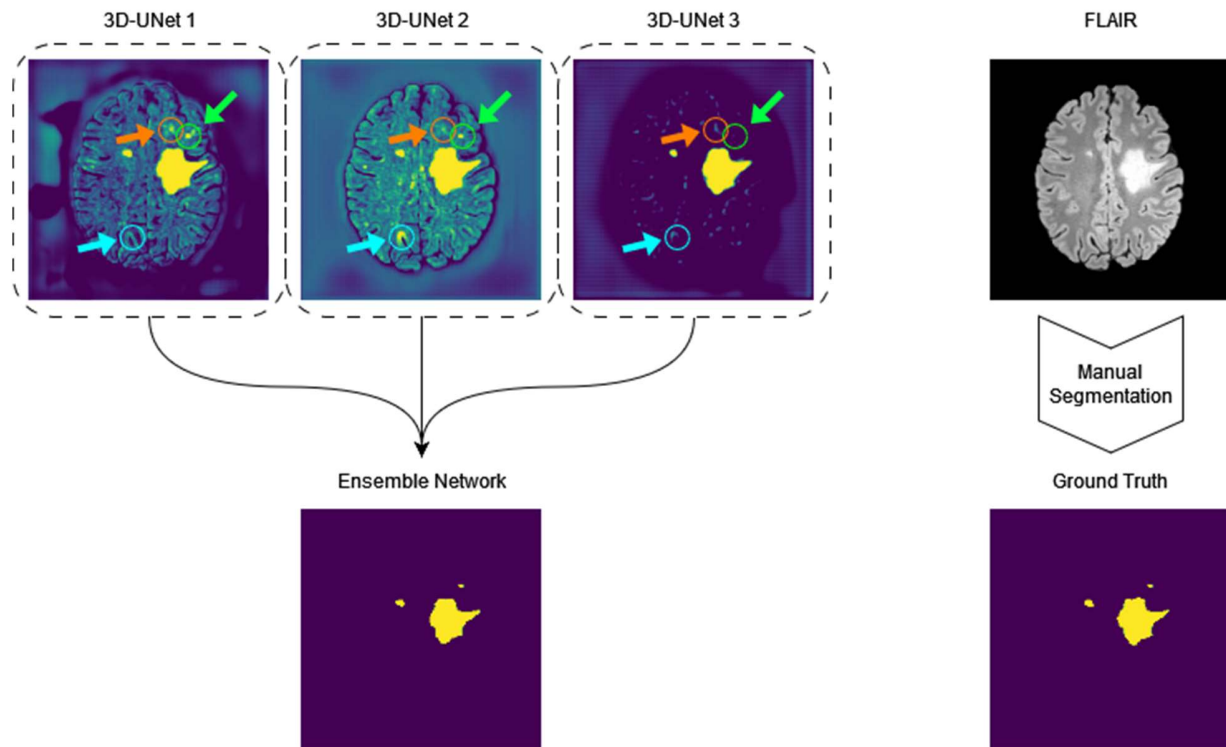

238

239

Figure 3

240

Rationale behind the ensemble network of LST-AI. First, the three 3D-UNets generate a lesion probability

241

map. The mean of the three outputs is calculated and thresholded to generate the final binary lesion map.

242

On the right-hand side, we show a slice of a FLAIR image and the corresponding manual segmentation

243

(i.e., the ground truth). The orange arrow and circle highlight a false positive present in the lesion

244

probability map of 3D-UNet 1, but not in the other lesion probability maps. The light blue arrow and circle

245

highlight a false positive present in the lesion probability map of 3D-UNet 2, but not in the other lesion

246

probability maps. The green arrow and circle highlight a false negative lesion in the lesion probability map

247

of 3D-UNet 3, which is detected by 3D-UNet 1 and 2. Note how the output of the ensemble network is

248

more accurate than the output of the individual networks, as it does not show the false positives and false

249

negatives.

250

251

As an additional feature, the tool can optionally label lesions according to their location, i.e.,

252

periventricular (PV), juxtacortical (JC), subcortical (SC), or infratentorial (IT). To this end, the

253

same ICBM 152 nonlinear T1 atlas used above is first registered deformably (using Greedy) to

254

the skull-stripped T1w image in MNI space. The resulting transformation is applied to a

255

manually labeled anatomical mask indicating different brain regions (inter alia: PV, IT, JC, and

256

SC), which is thereby registered to the skull-stripped T1w image in MNI space. Next, each

257

individual lesion from the binary lesion segmentation map is automatically labeled using a

258

connected-component analysis, and assigned to the region with which it overlaps (by at least

259

one voxel). During this step, lesions are assigned first to the PV, second to the IT, third to the

260

JC, and, finally, to the SC region. In the resulting lesion map, the lesions are labeled according

261

to their location (PV: label=1, JC: label=2, SC: label=3, IT: label=4). Finally, the labeled lesion

262

map is transformed to the original space of the FLAIR image with the inverse of the affine

263 transformation, which was computed earlier, resulting in location-annotated lesion maps in the  
264 original subject space as well as in the MNI space.

265  
266 We intend to target a diverse user base and provide LST-AI as a set of standalone command  
267 line tools and as a dockerized application, including all model checkpoints and required  
268 preprocessing tools (Greedy and HD-BET). As LST-AI can be used in similar ways as  
269 Freesurfer/FSL command line tools or nicMSLesions (docker), we give the opportunity to  
270 conveniently integrate our tool into existing workflows.

271  
272 For accelerated performance, we recommend using our tool in a GPU-enabled environment but  
273 we also provide a fallback method for CPU-only usage. Depending on the exact hardware  
274 setup, typical execution time varies between tens of seconds (GPU) and 1-2 minutes on a CPU-  
275 only system. We provide LST-AI's functionality for three different workflows: segmentation-only,  
276 lesion location annotation-only, or both. Moreover, labels can be exported in the original subject  
277 space or in the MNI-152 template space.

278  
279 Moreover, we make our source code available, allowing the community to adapt and tailor our  
280 tools for different application scenarios, by modifying preprocessing tools or using the  
281 checkpoints for pre-training of custom models. We intend to continuously maintain and update  
282 our tool in the github repository. In conclusion, while we have high confidence in the  
283 generalization capabilities of LST-AI, we want to emphasize that it is explicitly designed for  
284 research and non-clinical purposes. It has not undergone the necessary certification or licensing  
285 for clinical applications.

### 286 2.3.2. Benchmark methods

287 Evaluation of the performance of the proposed tool is realized through comparison to other  
288 publicly available lesion segmentation methods. This includes the widely used LST version 3.0.0  
289 (<https://www.applied-statistics.de/lst.html>) with its lesion growth algorithm (LGA) (Schmidt et al.,  
290 2012) and lesion prediction algorithm (LPA) (Vanderbecq et al., 2020), to which our proposed  
291 tool presents a complementary, AI-based lesion segmentation method. Additionally, a trained  
292 nnUNet and the recently published SAMSEG lesion segmentation tool implemented in  
293 Freesurfer version 7.3.2 (Cerri et al., 2021) are used for comparison.

294 • **LST-LGA** (Schmidt et al., 2012): This method requires T1w and FLAIR images that are not  
295 skull-stripped. Before applying the LST-LGA tool, T1w and FLAIR images are preprocessed  
296 as described in section 2.2. Additionally, images are denoised using the CAT12 (Gaser et  
297 al., 2022) denoising filter implemented in SPM12  
298 (<https://www.fil.ion.ucl.ac.uk/spm/software/spm12/>). Then, the LST-LGA lesion  
299 segmentation algorithm is applied. First, using the methods implemented in SPM12, bias  
300 field correction is applied to the FLAIR image, and the T1w image is segmented into white  
301 matter, grey matter, and cerebrospinal fluid. Based on the FLAIR intensities, lesion belief  
302 maps are generated for each tissue class. The lesion belief map of grey matter is then  
303 thresholded (default threshold of 0.3 as suggested in Schmidt et al., 2012), which results in  
304 seeds that are used for the lesion growth model. Thereby, lesion seeds are expanded

305 according to FLAIR hyperintensities, eventually producing a lesion probability map. Finally,  
306 a binary lesion map is generated after thresholding the lesion probability map (threshold of  
307 0.5).

308 • **LST-LPA** (Vanderbecq et al., 2020): This method requires only FLAIR images that are not  
309 skull-stripped. Preprocessing is identical to the LST-LGA workflow and includes registration  
310 to MNI and denoising. Similarly, bias correction is applied, and a lesion belief map is  
311 generated based on FLAIR intensities. The LST-LPA algorithm is a binary regression model  
312 that combines the lesion belief map and fixed parameters, which had been learned through  
313 logistic regression during the development of the tool in order to calculate the lesion  
314 probability map. The binary lesion map is again generated by applying a threshold to the  
315 lesion probability map (threshold of 0.5).

316 • **nnUNet** (Isensee et al., 2021): The UNet's early achievements in deep learning for  
317 biomedical segmentation have led to extensive research in refining its architecture for  
318 specialized tasks. Building on this, Isensee et al. (2021) have introduced an innovative  
319 framework that automates the selection of hyperparameters and data augmentation  
320 techniques based on the specific dataset employed. To provide this baseline, we format our  
321 training set according to nn-UNet's convention and train the model for 1000 epochs with  
322 five-fold cross-validation. We select the stronger 3D-UNet baseline in contrast to a 2D-UNet  
323 baseline, and use the full-resolution model as a baseline.

324 • **SAMSEG** (Cerri et al., 2021): This method requires only one MRI contrast image but it also  
325 accepts multiple contrasts. Here, we use T1w and FLAIR image pairs that are not skull-  
326 stripped as input. As recommended by the authors (Cerri et al., 2021), preprocessing is  
327 minimal, with images only being registered to MNI space using Greedy (P. A. Yushkevich et  
328 al., 2016). During the segmentation process, a deformable probabilistic atlas is used as  
329 segmentation prior and is iteratively fitted to the input data. Thereby, voxels are assigned to  
330 the brain structures with highest probability, including lesions. The binary lesion map is  
331 obtained by only selecting the voxels with lesion labels and setting all other voxel values to  
332 zero.

333  
334 For region-specific analyses, all binary lesion maps are annotated with the method implemented  
335 in the LST-AI tool. In effect, each lesion is labeled according to its location (i.e., PV, JC, IT, or  
336 SC).

### 337 2.3.3. Manual segmentation

338 We make use of multiple datasets. Therefore, the workflows of manual segmentation, i.e.,  
339 generation of ground truth lesion maps, differ. We describe the manual segmentation of the in-  
340 house datasets in detail. For public datasets, we refer to the corresponding publication.

341 • **in-house**: The training data were first pre-segmented using LST-LGA. Segmented lesions  
342 were manually reviewed and corrected by at least two out of four experienced  
343 neuroradiologists using ITK-SNAP (P. A. Yushkevich et al., 2006). Regarding test data,  
344 lesions were manually segmented and attributed to location labels by an experienced

345 neuroradiologist.

346 • **msisbi**: All images were manually delineated by two raters. Here we use the lesion map of  
347 rater 2. Since no consensus was available, we arbitrarily selected the lesion maps of one of  
348 the two raters as ground truth (rater 2). Protocol details have been described in the original  
349 publication (Carass et al., 2017).

350 • **msljob**: All images were delineated by three raters using a semi-automated approach. A  
351 consensus segmentation was obtained through revision of the combined lesion maps by all  
352 three raters; a detailed protocol is available in the original publication (Lesjak et al., 2018).

353 • **mssegtest & mssegtrain**: All images were manually delineated by seven raters, from  
354 which a consensus was constructed. Details on the protocol and consensus construction  
355 are available in the original publication (Commowick et al., 2021).

## 356 2.4. Evaluation

357 To assess the effectiveness of the LST-AI lesion segmentation tool, we compare its results with  
358 manual segmentations and other available tools. The tests exclude the internal training dataset  
359 and span the internal test datasets (1 and 2) and multiple external datasets to evaluate the  
360 generalizability. These external sets encompass various acquisition protocols, scanners, and  
361 originate from different centers. For consistency, we use images and lesion maps in MNI space.  
362 Our evaluation covers lesion location annotation, segmentation, and detection methods,  
363 applying a minimum lesion volume threshold of  $3\text{mm}^3$  corresponding to 3 MNI-space voxels.

### 364 2.4.1. Lesion location annotation

365 The lesion location annotation is evaluated using the manually segmented lesion maps of the in-  
366 house test2 cohort. We compute the confusion matrix to analyze the accuracy of the lesion  
367 location annotation, considering the manual annotation as ground truth and the automated  
368 annotation as prediction. The fraction of lesions that are correctly assigned to the corresponding  
369 regions is extracted from the confusion matrix.

### 370 2.4.2. Lesion segmentation

371 Regarding lesion segmentation evaluation, we rely on the animaSegPerfAnalyzer tool from the  
372 anima evaluation toolbox (<https://anima.irisa.fr/>), which was also used in the MICCAI 2016 MS  
373 lesion segmentation challenge (Commowick et al., 2018). It requires pairs of ground truth (i.e,  
374 manually segmented) and automatically segmented lesion maps. This toolbox computes various  
375 metrics to analyze the segmentation performance at both the voxel and lesion level. Regarding  
376 voxel-wise analysis, we were interested in the Dice Similarity Coefficient (DSC):

$$377 \quad DSC = \frac{2TP}{2TP + FP + FN}, \quad (1)$$

378 the positive predictive value (PPV):

$$379 \quad PPV = \frac{TP}{TP + FP}, \quad (2)$$

380 and the sensitivity:

$$381 \quad \textit{sensitivity} = \frac{TP}{TP + FN}, \quad (3)$$

382 where TP denotes the true positives, FP the false positives, FN the false negatives. In addition,  
383 we extracted the average surface distance (ASD) with the animaSegPerfAnalyzer tool:

$$384 \quad ASD = \frac{1}{n+n'} [\sum_{x=1}^n d(x, S') + \sum_{x'=1}^{n'} d(x', S)] \quad (4)$$

$$385 \quad \textit{with } d(x, S') = \min ||x - x' ||_2, \quad (5)$$

386 where n and n' are the number of points x and x' on the surface S of the manual segmentation  
387 and the surface S' of the automated segmentation, respectively, and d() is the minimal  
388 Euclidean distance between a point x on surface S and the surface S'.

389  
390 These metrics are calculated for each image, then averaged within each dataset, and finally  
391 averaged across all datasets. Thereby, we provide an overall score across different scanners  
392 and centers as well as individual scores for each dataset.

393  
394 As an additional step, we construct one array by concatenating all images and calculate the  
395 DSC across all lesions of all datasets. We will refer to these analyses, neglecting subject-wise  
396 information, as first-level analyses (and to those based on subject-wise performance measures  
397 as second-level analyses). Thereby, we avoid the per-subject lesion load bias that is introduced  
398 when one score is calculated per image. For example, missing a small lesion in an image with  
399 only this missed lesion (DSC=0) would have more weight than missing a similar lesion in an  
400 image with many other detected lesions (DSC>0).

401  
402 We further investigate whether the performance of lesion segmentation varies across brain  
403 regions. Thereby, we hope to identify the main drivers of the metric values and possible  
404 location-dependent variabilities of LST-AI segmentation performance. To this end, we use the  
405 location-annotated lesion maps and generate binary lesion maps for each region by only  
406 selecting lesion voxels labeled as part of the corresponding region. Using the above evaluation  
407 metrics, first-level analysis is conducted for each region and results from different regions and  
408 the whole brain are compared to each other.

### 409 2.4.3. Lesion detection

410 In addition to the previous metrics, which quantify the accuracy of lesion segmentation at the  
411 voxel level, it is important to evaluate lesion segmentation methods with regard to their ability to  
412 detect lesions. In particular, this aspect is crucial in MS, since its diagnosis relies on the  
413 detection of lesions (and not on the exact measurement of their volume). To this end, we extract  
414 the following scores from the animaSegPerfAnalyzer tool: SensL, the lesion detection  
415 sensitivity; PPVL, the positive predictive value for lesions; F1 score, a metric which considers  
416 both lesion detection sensitivity and positive predictive value for lesions. SensL and PPVL are  
417 calculated according to equations (3) and (2), respectively (on the lesion level rather than on the  
418 voxel level). The F1 score is calculated as follows:

419 
$$F1 = 2 * \frac{SensL * PPVL}{SensL + PPVL} = \frac{2TP}{2TP + FP + FN}, \quad (6)$$

420 which is equal to the equation (1) and can therefore be considered as a lesion-wise DSC.

421  
422 The anima evaluation toolbox also offers the animaDetectedComponents tool that can be used  
423 to investigate the detection of each lesion individually. For each image, the tool generates a list  
424 with lesions that are present in the manually segmented lesion map. It indicates, for each lesion,  
425 the volume in the manually segmented lesion map and whether it was detected by the  
426 automated segmentation method. This enables the assessment of the increase or decrease of  
427 lesion detection in relation to lesion volumes.

## 428 3. Results

429 We evaluate LST-AI in multiple aspects; we report both voxel-wise and lesion-wise scores, as  
430 both volume and number are established measures of lesion load. We start with lesion location  
431 annotation (3.1) as it is also relevant for the description of lesion segmentation (3.2). In 3.2, we  
432 report lesion segmentation across the whole brain and across subjects (second-level analyses).  
433 We then report the performance across lesions (first-level analyses) both across brain regions  
434 (3.3) and in relation to lesion volume (3.4).

### 435 3.1. Lesion location annotation

436 To evaluate the accuracy of the lesion location annotation, lesions of the in-house test2 cohort  
437 are manually assigned to four different brain regions and compared with the automatic  
438 annotation from LST-AI: PV, JC, SC, and IT. The confusion matrix is provided in Figure 4. In  
439 total, 847 lesions are assigned to the PV region during manual annotation, of which 682 (80.5%)  
440 are correctly assigned by the automatic method. In the JC region, 812 (86.9%) lesions are  
441 correctly classified and 108 (11.6%) are wrongly classified as PV. Less accurate classification is  
442 obtained in the SC region as only 285 (33.9%) lesions are identified as such and 220 (26.2%)  
443 and 335 (39.8%) are assigned to the PV and JC regions, respectively.

444  
445 Using LST-AI, we performed lesion location annotation across all test set samples. In all 270  
446 images included in the test set, 11154 lesions are segmented in the manually segmented lesion  
447 maps with a total lesion volume of  $2.96 * 10^6 \text{mm}^3$ . Most of the total lesion volume belongs to PV  
448 lesions (lesion volume:  $2.33 * 10^6 \text{mm}^3$  (78.8%), lesion number: 3069 (27.5%)), whereas the JC  
449 region contains the most lesions (lesion number: 5208 (46.7%), lesion volume:  $4.53 * 10^5 \text{mm}^3$   
450 (15.3%)). The other two regions have smaller lesion numbers (IT: 610 (5.5%), SC: 2267  
451 (20.3%)) and lesion volume (IT:  $7.42 * 10^4 \text{mm}^3$  (2.5%), SC:  $9.93 * 10^4 \text{mm}^3$  (3.4%)).

452  
453

|                 |    | automated labeling |     |     |     |
|-----------------|----|--------------------|-----|-----|-----|
|                 |    | PV                 | JC  | SC  | IT  |
| manual labeling | PV | 682                | 119 | 33  | 13  |
|                 | JC | 108                | 812 | 6   | 8   |
|                 | SC | 220                | 335 | 285 | 1   |
|                 | IT | 1                  | 0   | 0   | 106 |

454  
455 Figure 4  
456 The confusion matrix shows the accuracy of the automated lesion location annotation. The values  
457 represent the number of manually labeled lesions that were correctly and incorrectly assigned to the  
458 different brain regions through automated labeling. The in-house test2 cohort was used for this  
459 evaluation.  
460 Abbreviations: IT: infratentorial, JC: juxtacortical, PV: periventricular, SC: subcortical.

### 461 3.2. Second-level lesion segmentation across the whole brain

462 Lesion segmentation evaluation is conducted across all datasets as well as for each dataset  
463 individually. An overview of the results of each segmentation method across all datasets is  
464 provided in Table 3. A table with all anima metrics and results per case is included in the  
465 supplementary material.

466  
467



|                | voxel-wise  |             |             |             | lesion-wise |             |             |
|----------------|-------------|-------------|-------------|-------------|-------------|-------------|-------------|
| tool           | DSC         | PPV         | sensitivity | ASD         | F1          | SensL       | PPVL        |
| <b>LST-AI</b>  | 0.55 (0.18) | 0.75 (0.19) | 0.49 (0.22) | 1.15 (3.34) | 0.51 (0.21) | 0.67 (0.24) | 0.49 (0.24) |
| <b>LST-LGA</b> | 0.36 (0.20) | 0.68 (0.30) | 0.29 (0.19) | 2.06 (4.64) | 0.20 (0.15) | 0.27 (0.19) | 0.26 (0.23) |
| <b>LST-LPA</b> | 0.34 (0.20) | 0.59 (0.32) | 0.29 (0.18) | 1.49 (2.26) | 0.18 (0.14) | 0.30 (0.19) | 0.20 (0.20) |
| <b>nnUNet</b>  | 0.43 (0.20) | 0.84 (0.20) | 0.32 (0.19) | 2.34 (5.90) | 0.36 (0.24) | 0.42 (0.22) | 0.44 (0.30) |
| <b>SAMSEG</b>  | 0.41 (0.21) | 0.58 (0.27) | 0.37 (0.20) | 2.63 (6.87) | 0.29 (0.18) | 0.31 (0.19) | 0.38 (0.26) |

468 Table 3

469 The results of the lesion segmentation evaluation (second-level analysis across all test datasets) of each  
470 segmentation tool are presented. The metrics were calculated for each image in the test datasets, and  
471 values were subsequently averaged across all images. The averages are reported as mean (standard  
472 deviation).

473 Abbreviations: ASD: average surface distance, DSC: dice similarity coefficient, PPV: positive predictive  
474 value, PPVL: lesion-wise positive predictive value, SensL: lesion-wise sensitivity

475  
476 The proposed method outperforms the benchmark methods in all categories except for PPV,  
477 where only the nnUNet yields higher values (LST-AI: PPV=0.75 (0.19); nnUNet: PPV=0.84  
478 (0.20)). Notably, LST-AI achieves higher DSC and F1 scores (DSC=0.55 (0.18), F1=0.51 (0.21))  
479 compared to the other methods (DSC=0.34-0.43, F1=0.18-0.36), indicating superior  
480 segmentation performance both on a voxel-wise and on a lesion-wise level. The lowest ASD is  
481 also obtained with LST-AI, indicating more accurate lesion contouring compared to the  
482 benchmark methods. Overall the results show that LST-AI is able to identify more true lesions  
483 while increasing the fraction of correctly identified lesions among all segmented lesions  
484 compared to the benchmark methods.

485  
486 Evaluating each dataset individually, we can observe some variability for each method across  
487 datasets. For LST-AI, this is shown in Table 4. Of note, the performance on the in-house  
488 datasets is inferior to that on the public dataset (in-house: DSC=0.47-0.48 and F1=0.41-0.46;  
489 public datasets: DSC=0.61-0.74 and F1=0.57-0.70), which, however, is paralleled by lower  
490 lesion load in the in-house datasets compared to the other datasets.

491  
492

|                        | voxel-wise  |             |             |             | lesion-wise |             |             |
|------------------------|-------------|-------------|-------------|-------------|-------------|-------------|-------------|
| dataset                | DSC         | PPV         | sensitivity | ASD         | F1          | SensL       | PPVL        |
| All datasets<br>n=270  | 0.55 (0.18) | 0.75 (0.19) | 0.49 (0.22) | 1.15 (3.34) | 0.51 (0.21) | 0.67 (0.24) | 0.49 (0.24) |
| in-house test1<br>n=83 | 0.48 (0.20) | 0.60 (0.18) | 0.45 (0.22) | 3.06 (5.48) | 0.46 (0.21) | 0.46 (0.24) | 0.52 (0.22) |
| in-house test2         | 0.47 (0.11) | 0.91 (0.12) | 0.33 (0.09) | 0.30 (0.77) | 0.41 (0.19) | 0.84 (0.14) | 0.29 (0.16) |

|                    |             |             |             |             |             |             |             |
|--------------------|-------------|-------------|-------------|-------------|-------------|-------------|-------------|
| n=84               |             |             |             |             |             |             |             |
| msisbi<br>n=21     | 0.61 (0.13) | 0.72 (0.11) | 0.54 (0.15) | 0.41 (0.66) | 0.57 (0.12) | 0.55 (0.15) | 0.61 (0.13) |
| msljub<br>n=30     | 0.74 (0.10) | 0.80 (0.07) | 0.70 (0.14) | 0.21 (0.88) | 0.70 (0.10) | 0.62 (0.13) | 0.83 (0.11) |
| mssgtest<br>n=37   | 0.65 (0.16) | 0.68 (0.19) | 0.68 (0.16) | 0.59 (1.60) | 0.63 (0.17) | 0.83 (0.14) | 0.55 (0.22) |
| mssegtrain<br>n=15 | 0.67 (0.16) | 0.72 (0.16) | 0.67 (0.19) | 0.12 (0.24) | 0.61 (0.15) | 0.77 (0.23) | 0.53 (0.09) |

493 Table 4

494 The results of the LST-AI lesion segmentation evaluation (second-level analysis) of each test dataset are  
 495 presented. The metrics were calculated for each image in the respective test dataset, and values were  
 496 subsequently averaged across all images. The averages are reported as mean (standard deviation).  
 497 Abbreviations: ASD: average surface distance, DSC: dice similarity coefficient, PPV: positive predictive  
 498 value, PPVL: lesion-wise positive predictive value, SensL: lesion-wise sensitivity

### 499 3.3. First-level segmentation across brain regions

500 LST-AI shows the highest first-level DSC scores in the PV region. However, DSC scores differ  
 501 most in the other three regions with only LST-AI reaching DSC >0.38. Similarly, the highest first-  
 502 level DSC score within the whole brain is obtained with LST-AI. The results of the different  
 503 lesion segmentation methods are presented in Table 5 and Figure 5.

504  
505

| tool    | Periventricular (PV) | Infratentorial (IT) | Juxtacortical (JC) | Subcortical (SC) | Whole brain |
|---------|----------------------|---------------------|--------------------|------------------|-------------|
| LST-AI  | 0.70                 | 0.44                | 0.47               | 0.39             | 0.68        |
| LST-LGA | 0.54                 | 0.10                | 0.19               | 0.15             | 0.51        |
| LST-LPA | 0.56                 | 0.03                | 0.12               | 0.18             | 0.51        |
| nnUNet  | 0.56                 | 0.29                | 0.28               | 0.24             | 0.54        |
| SAMSEG  | 0.60                 | 0.20                | 0.16               | 0.22             | 0.56        |

506 Table 5

507 The first-level DSC score (across all test datasets) of each segmentation tool in different brain regions are  
 508 presented in this table.

509  
510

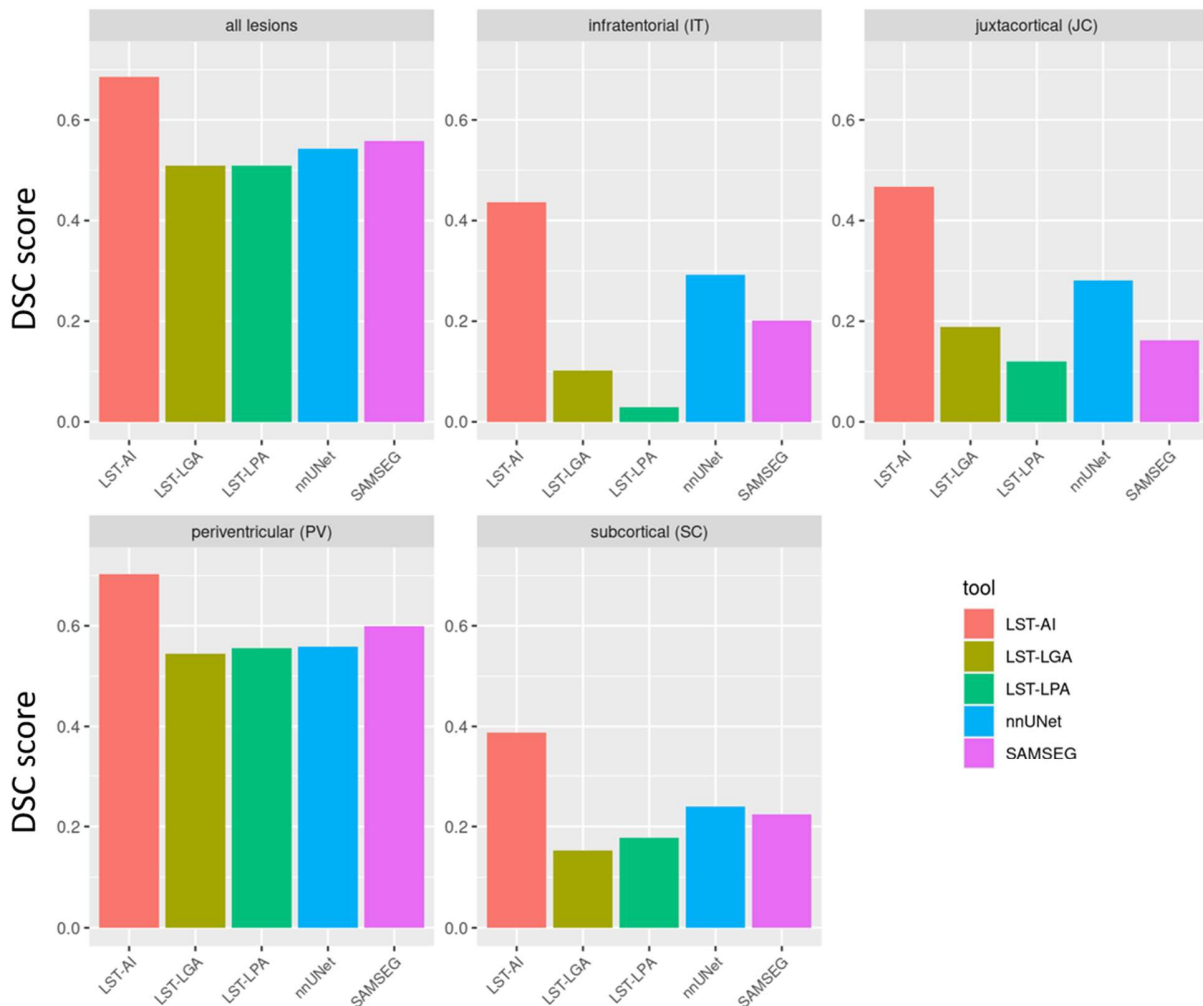

511  
 512 Figure 5  
 513 First-level DSC scores (across all test datasets) of each lesion segmentation tool are provided for lesions  
 514 in different brain regions: all lesions in the whole brain, infratentorial lesions, juxtacortical lesions,  
 515 periventricular lesions, and subcortical lesions.

### 516 3.4. First-level lesion detection in relation to lesion size

517 The lesion volume distribution of the test set is illustrated in Figure 6. The distribution shows a  
 518 fast and steep decline with the most frequent lesions being small. This is critical as there is no  
 519 commonly accepted minimum lesion volume (Grahl et al., 2019); moreover, accurate manual  
 520 lesion segmentation is challenging, cumbersome, and sometimes overwhelming, even for  
 521 expert readers. In Figure 7, we illustrate the accuracy of lesion detection in relation to lesion  
 522 volume (bin width of 10mm<sup>3</sup>). Small lesions (< 100 mm<sup>3</sup>) are detected worse. With increasing  
 523 lesion volume, the detection rate increases for all methods, with LST-AI showing the steepest  
 524 incline. Hence, the advantage of LST-AI also applies to small lesions. Notably, the overall  
 525 performance scores are considerably better for lesions > 100mm<sup>3</sup> than suggested by mere  
 526 SensL scores.  
 527

528

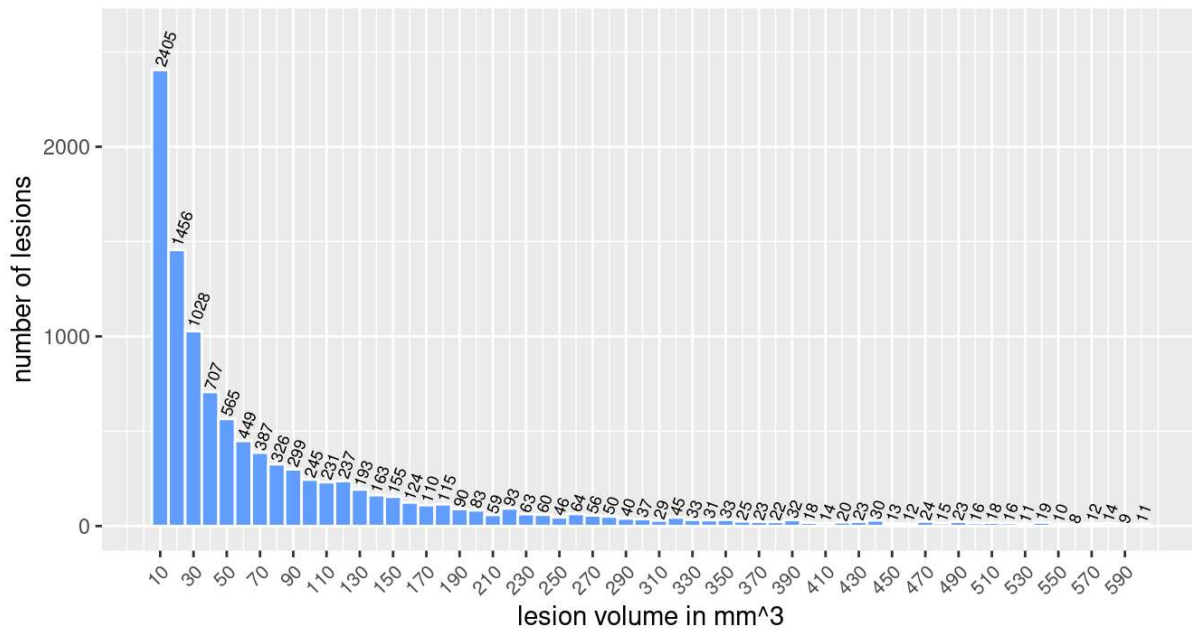

529

530 Figure 6

531 This graph shows the distribution of lesions per volume. The bars and numbers indicate how many  
532 lesions are in each volume group. We divided the lesions into groups with a volume range of 10mm<sup>3</sup> and  
533 the first bar from the left shows the number of lesions with a volume between 0mm<sup>3</sup> and 10mm<sup>3</sup>.

534

535

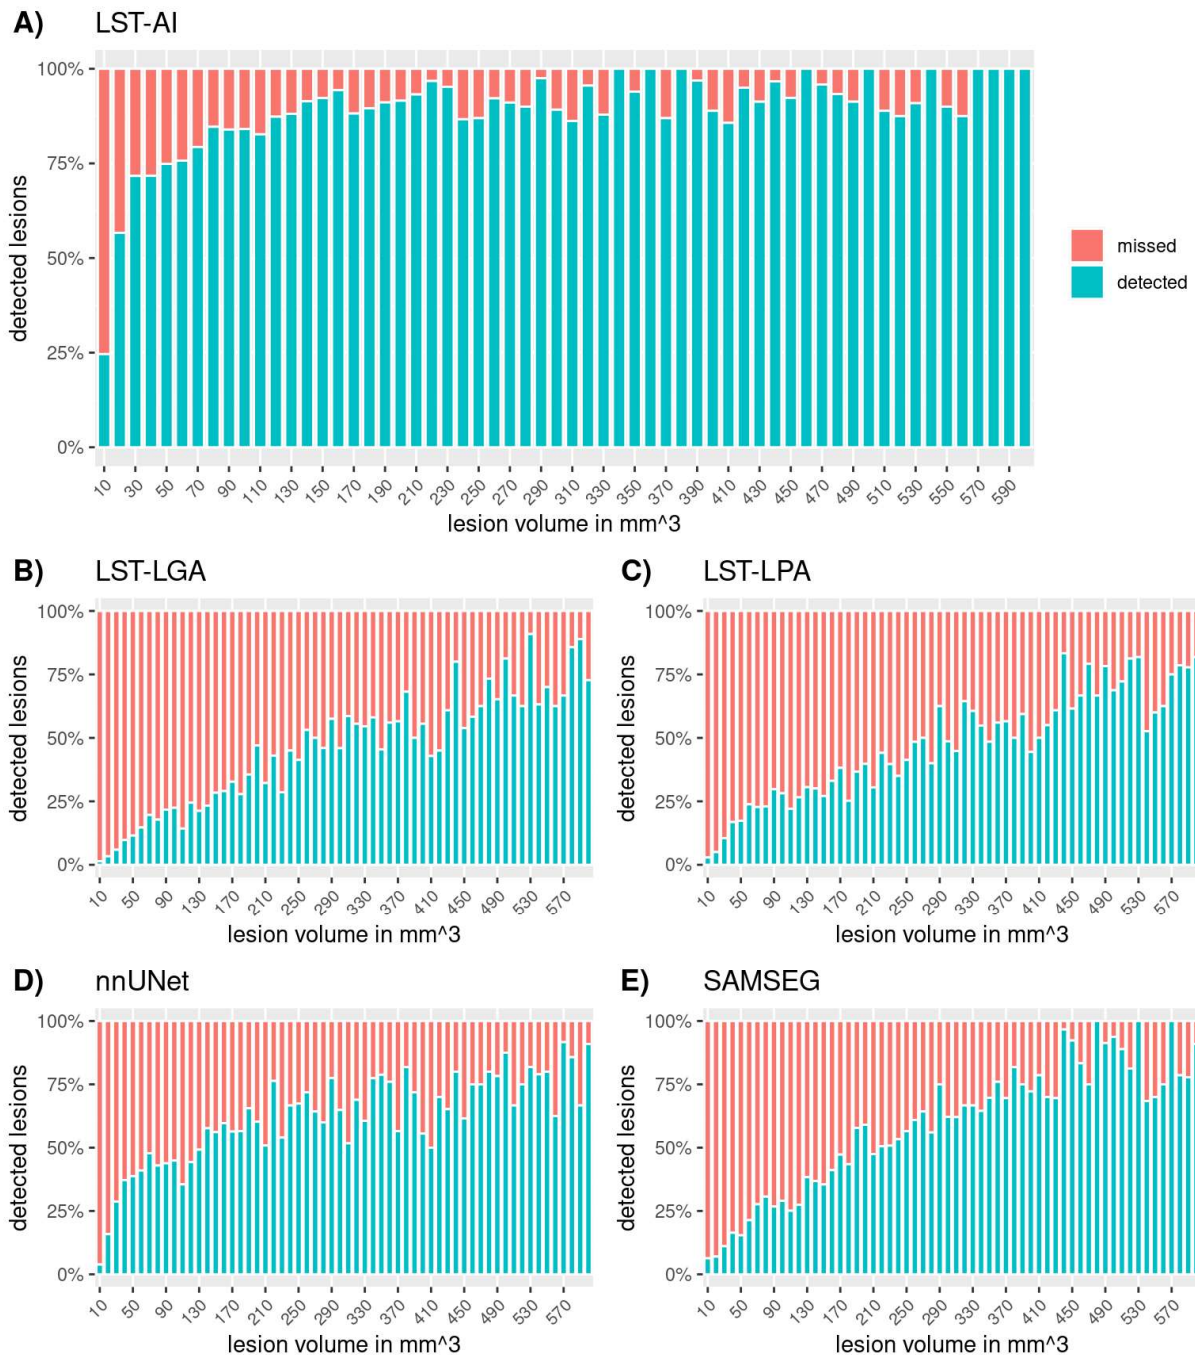

536  
537  
538  
539  
540  
541  
542

Figure 7

These graphs illustrate the proportion of lesions that are detected in each volume group. We divided the lesions into groups with a volume range of 10mm<sup>3</sup>. The first bar from the left indicates the detection rate for lesions with a volume between 0mm<sup>3</sup> and 10mm<sup>3</sup>. Note, how the detection rate increases with increasing lesion volume for each segmentation, whereby LST-AI yields the highest detection rates. The detection rate is given in %.

## 543 4. Discussion

544 We propose LST-AI, a new deep learning-based segmentation method for white-matter lesions  
545 in MS. It is built from an ensemble of three 3D UNets. Using LST-AI and a pair of T1w and  
546 FLAIR MRI images as input, it is possible to accurately segment lesions. We analyze the  
547 segmentation performance on multiple datasets, thereby showing that LST-AI generalizes to  
548 data from different centers and scanners without retraining. We also compare our method to  
549 benchmark methods for validation and find excellent lesion segmentation performance of our  
550 method. In addition, LST-AI can label lesions according to their location, thereby providing  
551 further possibilities for lesion characterization in multiple sclerosis.

552  
553 LST-AI is pre-trained on an in-house dataset consisting of 491 images and does not need to be  
554 retrained before it is applied to new data. This makes it possible to use the tool even in smaller  
555 centers, where data is scarce and only small cohorts are available. Valverde et al., 2019, have  
556 previously optimized retraining on small datasets, as their tool only requires a single case to  
557 adapt their model to new datasets. They also validated their method on the ISBI 2015 test  
558 dataset and achieved a mean DSC of 0.58 (Valverde et al., 2019). In general, high-performing  
559 segmentation models in the ISBI 2015 challenge were CNN-based (trained on ISBI 2015  
560 training dataset) and reported DSC scores ranging between 0.50 and 0.68 (Ma et al., 2022;  
561 Zhang & Oguz, 2021). However, assessing generalizability of segmentation models requires  
562 validation on external datasets. This has been done in recent studies, which used different train  
563 and test set pairings, including in-house and publicly available data such as ISBI 2015 and  
564 MICCAI 2016 data (e.g., train on in-house data and test on MICCAI 2016 data) (Billot et al.,  
565 2021; Cerri et al., 2021; Gentile et al., 2023; Kamraoui et al., 2022; X. Li et al., 2022; McKinley  
566 et al., 2021; Rakić et al., 2021). Overall, using train and test sets from different image domains  
567 led to lower and more variable DSC scores. For example, in the study by Kamraoui et al.  
568 (2022), the segmentation performance on the ISBI 2015 test dataset drops when models are  
569 trained on in-house data (DSC=0.13-0.48) compared to when they are trained on the ISBI  
570 training dataset (DSC=0.64-0.67). On the MICCAI 2016 dataset, however, the models trained  
571 on the in-house training dataset showed robust and high DSC scores (0.65-0.72) (Kamraoui et  
572 al., 2022). This highlights the impact of differing image domains in train and test sets and the  
573 need for validation on multiple test datasets, which can provide a more realistic representation  
574 of a model's generalizability. In this study, image domain heterogeneity is simulated by the  
575 validation of our method on multiple datasets, which were also part of MS lesion segmentation  
576 challenges of the ISBI 2015 conference and the MICCAI 2016 conference (Carass et al., 2017;  
577 Commowick et al., 2018, 2021). While our model achieves similar scores (mean DSC of 0.61  
578 and 0.65 for ISBI 2015 and MICCAI 2016, respectively) as the top-performing models in both  
579 challenges, we want to emphasize that, in contrast to the participating models, our model is not  
580 specifically trained on the corresponding training datasets provided in the challenges. These two  
581 scores are also close to the inter-rater DSC scores of the expert segmentation used in the  
582 challenges (DSC of 0.63 and 0.66-0.76 in ISBI 2015 and MICCAI 2016, respectively) (Carass et  
583 al., 2017; Commowick et al., 2021). Other studies investigating the generalizability of their  
584 model on external data reported similar DSC scores in the range of [0.48 - 0.72] (Cerri et al.,  
585 2021; Kamraoui et al., 2022; McKinley et al., 2021; Rakić et al., 2021). Regarding LST-AI, the

586 DSC scores for the three external datasets (range: 0.61-0.74) underline the good generalization  
587 of our model and its reliable application to multicenter data acquired with different scanners and  
588 protocols. Although being trained on data from the same scanner and with the same acquisition  
589 protocol, the performance on the in-house test sets is inferior to that on the public dataset. At  
590 first sight, this might be unexpected, but one has to consider that the lesion load of subjects in  
591 the in-house dataset is lower. In this context, we and others (Commowick et al., 2018) observed  
592 a considerable influence of lesion size on lesion segmentation performance, which likely  
593 contributed to this counter-intuitive observation. Overall, results from both second- and first-level  
594 analysis show high segmentation performance of LST-AI on unseen data. In contrast, the lower  
595 performance of the other methods, e.g., the pre-trained nnUNet, suggests the need for  
596 adaptation of these methods through retraining. We hypothesize that using an ensemble  
597 approach including multiple pre-trained UNets translates into robustness against performance  
598 variability of individual 3D UNets and, therefore, generalizes better across different imaging  
599 protocols and centers. Of note, the mean PPV and PPVL values of the benchmark methods are  
600 comparable to those of LST-AI. However, this appears to happen at the cost of sensitivity,  
601 where LST-AI clearly outperforms the other methods at the voxel and lesion level. Compared to  
602 the literature, lesion-wise sensitivity of LST-AI on MICCAI 2016 data (SensL=0.83) and ISBI  
603 2015 data (SensL=0.55) is in the same range as previously reported values (Carass et al.,  
604 2017; Commowick et al., 2018; Kamraoui et al., 2022; Krishnan et al., 2023; Ma et al., 2022;  
605 Zhang & Oguz, 2021). With regard to clinical applicability of automated lesion segmentation  
606 tools, the sensitivity is crucial as diagnosing and monitoring MS relies on the detection of (new)  
607 lesions. A newly published method, namely BIANCA-MS (Gentile et al., 2023), has also been  
608 validated using the MICCAI 2016 test dataset and yielded results similar to ours in terms of DSC  
609 and false positives (in terms of lesion detection). However, the median number of false  
610 negatives was equal to 11 (IQR: 18) for BIANCA-MS, whereas LST-AI yields a median number  
611 of false negatives equal to 4 (IQR: 8), again highlighting the high sensitivity of our proposed  
612 method towards lesion detection.

613  
614 In MS, lesion location within the brain may play an important role in identifying different disease  
615 patterns (Pongratz et al., 2023). In the LST-AI toolbox, a method is included which is able to  
616 classify lesions into four categories according to their location (PV, IT, JC, and SC). This makes  
617 it possible to seamlessly analyze the lesion load in different brain regions relevant to MS. In the  
618 in-house test2 cohort, the automated lesion location annotation is well in accordance with the  
619 manual lesion location annotation, except for SC lesions, where many lesions were classified as  
620 either PV (26.2% of all SC lesions) or JC (39.8% of SC all lesions) lesions. However, this  
621 accuracy drop should not be overly alarming, since the lesions are sometimes overlapping with  
622 multiple regions and are assigned to the SC region in the last iteration of the annotation. In other  
623 words, if a lesion is overlapping with multiple regions, it is always assigned to a region other  
624 than SC. When looking at the segmentation performance in the four different brain regions, it  
625 stands out that, among all methods included in this publication, LST-AI shows the highest DSC  
626 score in all regions. The increased lesion segmentation performance in the JC region is a  
627 particularly relevant finding, since segmentation of lesions close to the cortex based on T1w and  
628 FLAIR images has always been a challenge in MS. Also, juxtacortical lesions are thought to be

629 very specific for MS and are strongly associated with clinical disability (Calabrese et al., 2012),  
630 making their detection very important.

631  
632 We also investigated the lesion detection in relation to lesion volume and we found that LST-AI  
633 has a higher lesion detection sensitivity for small lesions than the benchmark methods. Similar  
634 to previous reports by Commowick et al. (2018) and Rakić et al. (2021), we also found that it is  
635 particularly hard to detect small lesions ( $<10\text{mm}^3$ ). Nonetheless, the steep incline of lesion  
636 detection with lesion size provides a promising perspective for the integration of automated  
637 lesion segmentation tools in clinical settings, since it can help clinicians to detect lesions faster  
638 and to diagnose and monitor MS more accurately.

639  
640 Our study does not come without limitations. First, our model requires T1w and FLAIR image  
641 pairs, which might not always be available. Second, although less pronounced than in the  
642 benchmark methods, our model still shows a decrease in lesion detection efficiency with  
643 decreasing lesion volumes. Even though the explainability of features learned via CNNs and  
644 more specifically U-Nets have been comparatively well studied, they still lack some  
645 interpretability in contrast to methods leveraging manually selected features. In addition,  
646 preprocessing is included in the LST-AI toolbox and includes registration to MNI space, which  
647 ensures identical image dimensions and orientation before segmenting lesions. However,  
648 preprocessing steps are known to be crucial in segmentation tasks. Hence, exploring and  
649 applying different preprocessing steps could possibly change the performance on some  
650 datasets.

651  
652 In conclusion, we introduce LST-AI, a new lesion segmentation toolbox and make it publicly  
653 available on GitHub (<https://github.com/Complmg/LST-AI>). It includes a preprocessing pipeline  
654 as well as an ensemble of three 3D UNets with binary cross-entropy and Tversky loss, making it  
655 a holistic lesion segmentation tool, enabling easy-to-implement, quick, and accurate automated  
656 lesion segmentation for MS research without retraining and fine-tuning. We validated its  
657 robustness on multiple datasets (in-house and publicly available datasets) and found excellent  
658 performance. We believe that, in future studies, LST-AI should replace LST.

## 659 References

- 660  
661 Billot, B., Cerri, S., Leemput, K. V., Dalca, A. V., & Iglesias, J. E. (2021). Joint Segmentation Of  
662 Multiple Sclerosis Lesions And Brain Anatomy In MRI Scans Of Any Contrast And  
663 Resolution With CNNs. *2021 IEEE 18th International Symposium on Biomedical Imaging*  
664 *(ISBI)*, 1971–1974. <https://doi.org/10.1109/ISBI48211.2021.9434127>  
665 Calabrese, M., Poretto, V., Favaretto, A., Alessio, S., Bernardi, V., Romualdi, C., Rinaldi, F.,  
666 Perini, P., & Gallo, P. (2012). Cortical lesion load associates with progression of



- 667 disability in multiple sclerosis. *Brain: A Journal of Neurology*, 135(Pt 10), 2952–2961.  
668 <https://doi.org/10.1093/brain/aws246>
- 669 Carass, A., Roy, S., Jog, A., Cuzzocreo, J. L., Magrath, E., Gherman, A., Button, J., Nguyen, J.,  
670 Prados, F., Sudre, C. H., Jorge Cardoso, M., Cawley, N., Ciccarelli, O., Wheeler-  
671 Kingshott, C. A. M., Ourselin, S., Catanese, L., Deshpande, H., Maurel, P., Commowick,  
672 O., ... Pham, D. L. (2017). Longitudinal multiple sclerosis lesion segmentation: Resource  
673 and challenge. *Neuroimage*, 148, 77–102.  
674 <https://doi.org/10.1016/j.neuroimage.2016.12.064>
- 675 Cerri, S., Puonti, O., Meier, D. S., Wuerfel, J., Mühlau, M., Siebner, H. R., & Van Leemput, K.  
676 (2021). A contrast-adaptive method for simultaneous whole-brain and lesion  
677 segmentation in multiple sclerosis. *NeuroImage*, 225, 117471.  
678 <https://doi.org/10.1016/j.neuroimage.2020.117471>
- 679 Çiçek, Ö., Abdulkadir, A., Lienkamp, S. S., Brox, T., & Ronneberger, O. (2016). 3D U-Net:  
680 Learning Dense Volumetric Segmentation from Sparse Annotation. In S. Ourselin, L.  
681 Joskowicz, M. R. Sabuncu, G. Unal, & W. Wells (Eds.), *Medical Image Computing and*  
682 *Computer-Assisted Intervention – MICCAI 2016* (pp. 424–432). Springer International  
683 Publishing. [https://doi.org/10.1007/978-3-319-46723-8\\_49](https://doi.org/10.1007/978-3-319-46723-8_49)
- 684 Commowick, O., Istace, A., Kain, M., Laurent, B., Leray, F., Simon, M., Pop, S. C., Girard, P.,  
685 Ameli, R., Ferre, J. C., Kerbrat, A., Tourdias, T., Cervenansky, F., Glatard, T.,  
686 Beaumont, J., Doyle, S., Forbes, F., Knight, J., Khademi, A., ... Barillot, C. (2018).  
687 Objective Evaluation of Multiple Sclerosis Lesion Segmentation using a Data  
688 Management and Processing Infrastructure. *Sci Rep*, 8(1), 13650.  
689 <https://doi.org/10.1038/s41598-018-31911-7>
- 690 Commowick, O., Kain, M., Casey, R., Ameli, R., Ferré, J.-C., Kerbrat, A., Tourdias, T.,  
691 Cervenansky, F., Camarasu-Pop, S., Glatard, T., Vukusic, S., Edan, G., Barillot, C.,  
692 Dojat, M., & Cotton, F. (2021). Multiple sclerosis lesions segmentation from multiple

693 experts: The MICCAI 2016 challenge dataset. *NeuroImage*, 244, 118589.  
694 <https://doi.org/10.1016/j.neuroimage.2021.118589>

695 Diaz-Hurtado, M., Martínez-Heras, E., Solana, E., Casas-Roma, J., Llufríu, S., Kanber, B., &  
696 Prados, F. (2022). Recent advances in the longitudinal segmentation of multiple  
697 sclerosis lesions on magnetic resonance imaging: A review. *Neuroradiology*, 64(11),  
698 2103–2117. <https://doi.org/10.1007/s00234-022-03019-3>

699 Filippi, M., Bar-Or, A., Piehl, F., Preziosa, P., Solari, A., Vukusic, S., & Rocca, M. A. (2018).  
700 Multiple sclerosis. *Nature Reviews Disease Primers*, 4(1), Article 1.  
701 <https://doi.org/10.1038/s41572-018-0041-4>

702 Gaser, C., Dahnke, R., Thompson, P. M., Kurth, F., Luders, E., & Initiative, A. D. N. (2022). *CAT*  
703 – *A Computational Anatomy Toolbox for the Analysis of Structural MRI Data* (p.  
704 2022.06.11.495736). bioRxiv. <https://doi.org/10.1101/2022.06.11.495736>

705 Gentile, G., Jenkinson, M., Griffanti, L., Luchetti, L., Leoncini, M., Inderyas, M., Mortilla, M.,  
706 Cortese, R., De Stefano, N., & Battaglini, M. (2023). BIANCA-MS: An optimized tool for  
707 automated multiple sclerosis lesion segmentation. *Human Brain Mapping*.  
708 <https://doi.org/10.1002/hbm.26424>

709 Grahl, S., Pongratz, V., Schmidt, P., Engl, C., Bussas, M., Radetz, A., Gonzalez-Escamilla, G.,  
710 Groppa, S., Zipp, F., Lukas, C., Kirschke, J., Zimmer, C., Hoshi, M., Berthele, A.,  
711 Hemmer, B., & Mühlau, M. (2019). Evidence for a white matter lesion size threshold to  
712 support the diagnosis of relapsing remitting multiple sclerosis. *Multiple Sclerosis and*  
713 *Related Disorders*, 29, 124–129. <https://doi.org/10.1016/j.msard.2019.01.042>

714 <https://anima.irisa.fr/>. (n.d.). ANIMA. Retrieved August 8, 2023, from <https://anima.irisa.fr/>

715 <https://www.applied-statistics.de/lst.html>. (n.d.). LST – Lesion Segmentation for SPM. Retrieved  
716 July 28, 2023, from <https://www.applied-statistics.de/lst.html>

717 <https://www.fil.ion.ucl.ac.uk/spm/software/spm12/>. (n.d.). SPM12 Software - Statistical  
718 Parametric Mapping. Retrieved July 28, 2023, from

- 719 <https://www.fil.ion.ucl.ac.uk/spm/software/spm12/>
- 720 Isensee, F., Jaeger, P. F., Kohl, S. A. A., Petersen, J., & Maier-Hein, K. H. (2021). nnU-Net: A  
721 self-configuring method for deep learning-based biomedical image segmentation. *Nature*  
722 *Methods*, 18(2), Article 2. <https://doi.org/10.1038/s41592-020-01008-z>
- 723 Isensee, F., Schell, M., Pflueger, I., Brugnara, G., Bonekamp, D., Neuberger, U., Wick, A.,  
724 Schlemmer, H.-P., Heiland, S., Wick, W., Bendszus, M., Maier-Hein, K. H., &  
725 Kickingeder, P. (2019). Automated brain extraction of multisequence MRI using  
726 artificial neural networks. *Human Brain Mapping*, 40(17), 4952–4964.  
727 <https://doi.org/10.1002/hbm.24750>
- 728 Kamraoui, R. A., Ta, V.-T., Tourdias, T., Mansencal, B., Manjon, J. V., & Coup, P. (2022).  
729 DeepLesionBrain: Towards a broader deep-learning generalization for multiple sclerosis  
730 lesion segmentation. *Medical Image Analysis*, 76, 102312.  
731 <https://doi.org/10.1016/j.media.2021.102312>
- 732 Krishnan, A. P., Song, Z., Clayton, D., Jia, X., de Crespigny, A., & Carano, R. A. D. (2023).  
733 Multi-arm U-Net with dense input and skip connectivity for T2 lesion segmentation in  
734 clinical trials of multiple sclerosis. *Scientific Reports*, 13(1), Article 1.  
735 <https://doi.org/10.1038/s41598-023-31207-5>
- 736 Lesjak, Z., Galimzianova, A., Koren, A., Lukin, M., Pernus, F., Likar, B., & Spiclin, Z. (2018). A  
737 Novel Public MR Image Dataset of Multiple Sclerosis Patients With Lesion  
738 Segmentations Based on Multi-rater Consensus. *Neuroinformatics*, 16(1), 51–63.  
739 <https://doi.org/10.1007/s12021-017-9348-7>
- 740 Li, H., Jiang, G., Zhang, J., Wang, R., Wang, Z., Zheng, W.-S., & Menze, B. (2018). Fully  
741 convolutional network ensembles for white matter hyperintensities segmentation in MR  
742 images. *NeuroImage*, 183, 650–665. <https://doi.org/10.1016/j.neuroimage.2018.07.005>
- 743 Li, X., Zhao, Y., Jiang, J., Cheng, J., Zhu, W., Wu, Z., Jing, J., Zhang, Z., Wen, W., Sachdev, P.  
744 S., Wang, Y., Liu, T., & Li, Z. (2022). White matter hyperintensities segmentation using

- 745 an ensemble of neural networks. *Human Brain Mapping*, 43(3), 929–939.  
746 <https://doi.org/10.1002/hbm.25695>
- 747 Ma, Y., Zhang, C., Cabezas, M., Song, Y., Tang, Z., Liu, D., Cai, W., Barnett, M., & Wang, C.  
748 (2022). Multiple Sclerosis Lesion Analysis in Brain Magnetic Resonance Images:  
749 Techniques and Clinical Applications. *IEEE Journal of Biomedical and Health*  
750 *Informatics*, 26(6), 2680–2692. <https://doi.org/10.1109/JBHI.2022.3151741>
- 751 McKinley, R., Wepfer, R., Aschwanden, F., Grunder, L., Muri, R., Rummel, C., Verma, R.,  
752 Weisstanner, C., Reyes, M., Salmen, A., Chan, A., Wagner, F., & Wiest, R. (2021).  
753 Simultaneous lesion and brain segmentation in multiple sclerosis using deep neural  
754 networks. *Sci Rep*, 11(1), 1087. <https://doi.org/10.1038/s41598-020-79925-4>
- 755 Pongratz, V., Bussas, M., Schmidt, P., Grahl, S., Gasperi, C., El Hussein, M., Harabacz, L.,  
756 Pineker, V., Sepp, D., Grundl, L., Wiestler, B., Kirschke, J., Zimmer, C., Berthele, A.,  
757 Hemmer, B., & Mühlau, M. (2023). Lesion location across diagnostic regions in multiple  
758 sclerosis. *NeuroImage: Clinical*, 37, 103311. <https://doi.org/10.1016/j.nicl.2022.103311>
- 759 Rakić, M., Vercruyssen, S., Van Eyndhoven, S., de la Rosa, E., Jain, S., Van Huffel, S., Maes,  
760 F., Smeets, D., & Sima, D. M. (2021). icobrain ms 5.1: Combining unsupervised and  
761 supervised approaches for improving the detection of multiple sclerosis lesions.  
762 *NeuroImage: Clinical*, 31, 102707. <https://doi.org/10.1016/j.nicl.2021.102707>
- 763 Salehi, S. S. M., Erdogmus, D., & Gholipour, A. (2017). *Tversky loss function for image*  
764 *segmentation using 3D fully convolutional deep networks* (arXiv:1706.05721). arXiv.  
765 <https://doi.org/10.48550/arXiv.1706.05721>
- 766 Schmidt, P., Gaser, C., Arsic, M., Buck, D., Förchler, A., Berthele, A., Hoshi, M., Ilg, R.,  
767 Schmid, V. J., Zimmer, C., Hemmer, B., & Mühlau, M. (2012). An automated tool for  
768 detection of FLAIR-hyperintense white-matter lesions in Multiple Sclerosis. *NeuroImage*,  
769 59(4), 3774–3783. <https://doi.org/10.1016/j.neuroimage.2011.11.032>
- 770 Thompson, A. J., Banwell, B. L., Barkhof, F., Carroll, W. M., Coetzee, T., Comi, G., Correale, J.,

- 771 Fazekas, F., Filippi, M., Freedman, M. S., Fujihara, K., Galetta, S. L., Hartung, H. P.,  
772 Kappos, L., Lublin, F. D., Marrie, R. A., Miller, A. E., Miller, D. H., Montalban, X., ...  
773 Cohen, J. A. (2018). Diagnosis of multiple sclerosis: 2017 revisions of the McDonald  
774 criteria. *The Lancet Neurology*, 17(2), 162–173. [https://doi.org/10.1016/S1474-](https://doi.org/10.1016/S1474-4422(17)30470-2)  
775 [4422\(17\)30470-2](https://doi.org/10.1016/S1474-4422(17)30470-2)
- 776 Thompson, A. J., Baranzini, S. E., Geurts, J., Hemmer, B., & Ciccarelli, O. (2018). Multiple  
777 sclerosis. *Lancet (London, England)*, 391(10130), 1622–1636.  
778 [https://doi.org/10.1016/S0140-6736\(18\)30481-1](https://doi.org/10.1016/S0140-6736(18)30481-1)
- 779 Valverde, S., Salem, M., Cabezas, M., Pareto, D., Vilanova, J. C., Ramió-Torrentà, L., Rovira,  
780 À., Salvi, J., Oliver, A., & Lladó, X. (2019). One-shot domain adaptation in multiple  
781 sclerosis lesion segmentation using convolutional neural networks. *NeuroImage:*  
782 *Clinical*, 21, 101638. <https://doi.org/10.1016/j.nicl.2018.101638>
- 783 Vanderbecq, Q., Xu, E., Stroer, S., Couvy-Duchesne, B., Diaz Melo, M., Dormont, D., Colliot,  
784 O., & Alzheimer's Disease Neuroimaging, I. (2020). Comparison and validation of seven  
785 white matter hyperintensities segmentation software in elderly patients. *Neuroimage*  
786 *Clin*, 27, 102357. <https://doi.org/10.1016/j.nicl.2020.102357>
- 787 Wang, L., Lee, C.-Y., Tu, Z., & Lazebnik, S. (2015). *Training Deeper Convolutional Networks*  
788 *with Deep Supervision* (arXiv:1505.02496). arXiv.  
789 <https://doi.org/10.48550/arXiv.1505.02496>
- 790 Yushkevich, P. (2023). *Greedy [C++]*. <https://github.com/pyushkevich/greedy> (Original work  
791 published 2016)
- 792 Yushkevich, P. A., Piven, J., Hazlett, H. C., Smith, R. G., Ho, S., Gee, J. C., & Gerig, G. (2006).  
793 User-guided 3D active contour segmentation of anatomical structures: Significantly  
794 improved efficiency and reliability. *NeuroImage*, 31(3), 1116–1128.  
795 <https://doi.org/10.1016/j.neuroimage.2006.01.015>
- 796 Yushkevich, P. A., Pluta, J., Wang, H., Wisse, L. E. M., Das, S., & Wolk, D. (2016). Fast

- 797 Automatic Segmentation of Hippocampal Subfields and Medial Temporal Lobe  
798 Subregions In 3 Tesla and 7 Tesla T2-Weighted MRI. *Alzheimer's & Dementia*,  
799 *12(7S\_Part\_2)*, P126–P127. <https://doi.org/10.1016/j.jalz.2016.06.205>
- 800 Zeng, C., Gu, L., Liu, Z., & Zhao, S. (2020). Review of Deep Learning Approaches for the  
801 Segmentation of Multiple Sclerosis Lesions on Brain MRI. *Frontiers in Neuroinformatics*,  
802 *14*. <https://www.frontiersin.org/articles/10.3389/fninf.2020.610967>
- 803 Zhang, H., & Oguz, I. (2021). Multiple Sclerosis Lesion Segmentation—A Survey of Supervised  
804 CNN-Based Methods. In A. Crimi & S. Bakas (Eds.), *Brainlesion: Glioma, Multiple*  
805 *Sclerosis, Stroke and Traumatic Brain Injuries* (pp. 11–29). Springer International  
806 Publishing. [https://doi.org/10.1007/978-3-030-72084-1\\_2](https://doi.org/10.1007/978-3-030-72084-1_2)

807

808 **Acknowledgments:**

809 We thank Naga Karthik Enamundram and Joshua Newton for helpful discussions around the  
810 packaging of LST-AI, the evaluation of the different algorithms using the anima toolbox, and for  
811 visualization of the UNet architecture.

812

813 **Funding:**

814 MM received funding by a research grant of the National Institutes of Health (grant  
815 1R01NS112161-01). MM received funding by the Bavarian State Ministry for Science and Art  
816 (Collaborative Bilateral Research Program Bavaria – Québec: AI in medicine, grant F.4-  
817 V0134.K5.1/86/34). BM, DR, MM and BW received funding from the DFG, SPP Radiomics  
818 (project number 428223038).

819

820 **Data and code availability:**

821 We provide our toolbox as source code, command line tool and dockerized application at  
822 <https://github.com/Complmg/LST-AI>.

823

824 **Author contributions:**

825 Tun Wiltgen: Conceptualization, Methodology, Software, Formal analysis, Investigation, Data  
826 curation, Writing - original draft, Visualization

827 Julian McGinnis: Conceptualization, Methodology, Software, Formal analysis, Data curation,  
828 Writing - original draft, Visualization

829 Sarah Schlaeger: Investigation, Resources, Data curation, Writing - review & editing

830 Cuici Voon: Investigation, Data curation, Writing - review & editing

831 Achim Berthele: Resources, Writing - review & editing

832 Daria Bischl: Resources, Data curation, Writing - review & editing

833 Lioba Grundl: Resources, Data curation, Writing - review & editing

- 834 Nikolaus Will: Resources, Data curation, Writing - review & editing  
835 Marie Metz: Resources, Data curation, Writing - review & editing  
836 David Schinz: Resources, Data curation, Writing - review & editing  
837 Dominik Sepp: Resources, Data curation, Writing - review & editing  
838 Philipp Prucker: Resources, Data curation, Writing - review & editing  
839 Benita Schmitz-Koep: Resources, Data curation, Writing - review & editing  
840 Claus Zimmer: Resources, Writing - review & editing  
841 Bjoern Menze: Resources, Writing - review & editing  
842 Daniel Rückert: Resources, Writing - review & editing  
843 Bernhard Hemmer: Resources, Writing - review & editing  
844 Jan Kirschke: Investigation, Resources, Data curation, Writing - review & editing  
845 Mark Mühlau: Conceptualization, Methodology, Resources, Writing - review & editing,  
846 Supervision, Project administration, Funding acquisition  
847 Benedikt Wiestler: Conceptualization, Methodology, Software, Formal analysis, Data curation,  
848 Writing - original draft, Supervision, Project administration, Funding acquisition  
849  
850 **Declaration of Competing Interests:**  
851 The authors declare no competing interests.
